# Supplementary material for: Histone Acetylation Domains Are Differentially Induced during Development of Heart Failure in Dahl Salt-Sensitive Rats
Source: Int J Mol Sci. 2021 Feb 10;22(4):1771. doi: 10.3390/ijms22041771 (PMC7916721; doi:10.3390/ijms22041771)
Supplement: Supplementary file 1 [file ijms-22-01771-s001.pdf]

Supplemental Figure. 1

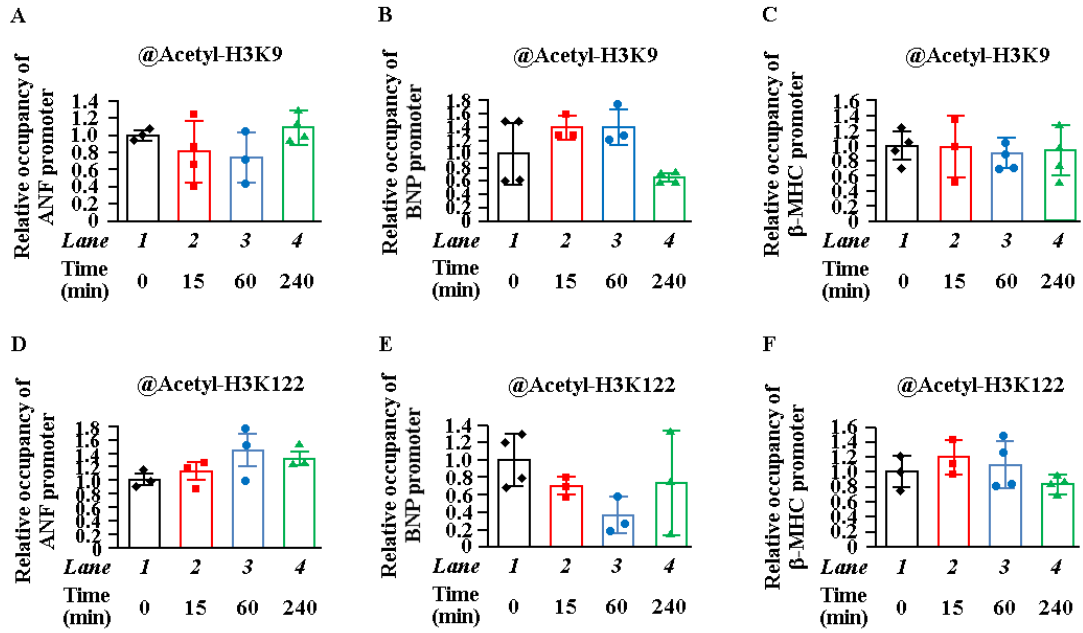

**Supplemental Fig. 1 The acetylation levels of H3K9 and H3K122 were not changed around the upstream region of the hypertrophic response gene promoters**

(A-F) ChIP assays were performed using cardiomyocyte lysates treated with or without PE for 0, 15, 60, or 240 min with anti-acetyl-histone H3K9 antibody (A-C), anti-acetyl-histone H3K122 antibody (D-F), or normal rabbit IgG as a negative control (not detected). N=3 to 4; *one-way* ANOVA followed by Tukey test. \*  $p < 0.05$ .

Supplemental Figure. 2

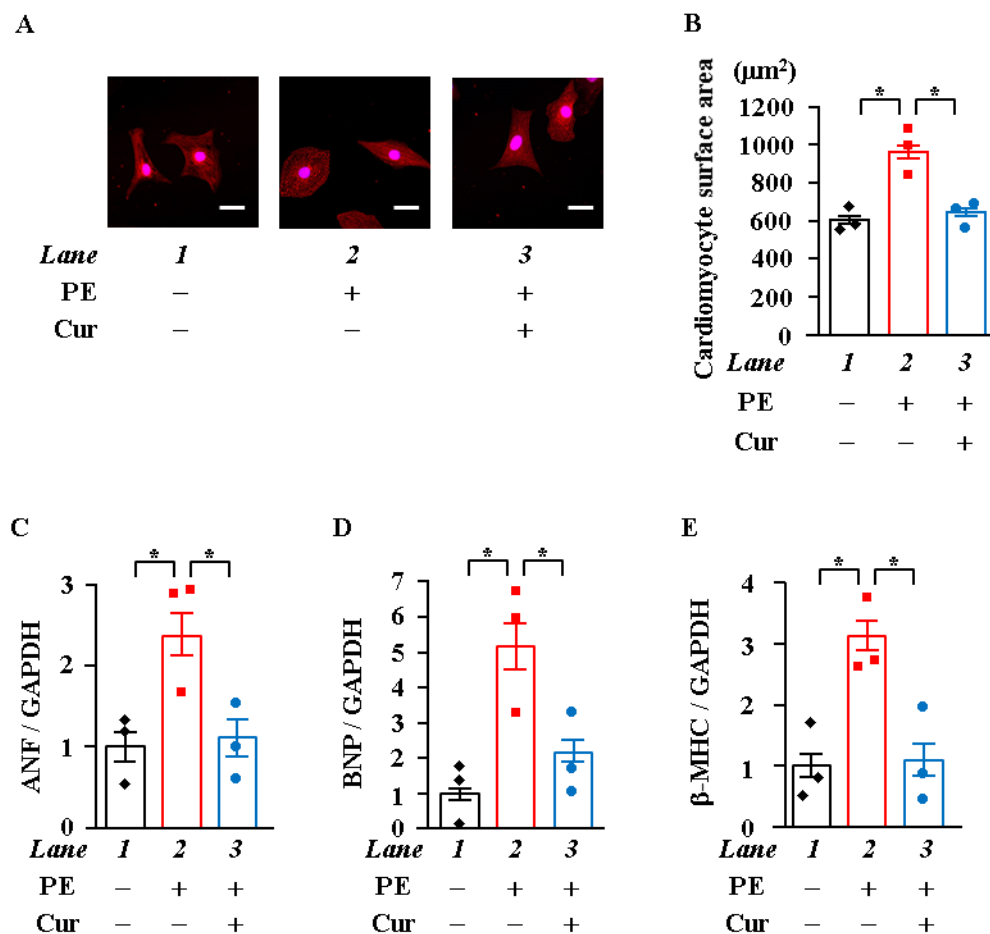

**Supplemental Fig. 2 Curcumin treatment inhibited cardiomyocyte hypertrophy**

Primary cultured neonatal rat cardiomyocytes were treated with curcumin (10  $\mu$ M) for 2 hours, then with PE (30  $\mu$ M), as described in Fig. 2. **(A and B)** Immunofluorescence staining was performed with anti-MHC antibody. The areas of 50 randomly-chosen cells were measured using ImageJ v4.16. **(A)** is representative photographic image of cardiomyocytes, and **(B)** is a quantification of **(A)**. Scale bar: 20  $\mu$ m. **(C-E)** mRNAs were extracted from the cardiomyocytes, and mRNA levels of **(C)** ANF, **(D)** BNP, and **(E)**  $\beta$ -MHC were measured by qRT-PCR assay. **(B-E)**, N=3; one-way ANOVA followed by Tukey test. \*  $p < 0.05$

Supplemental Figure. 3

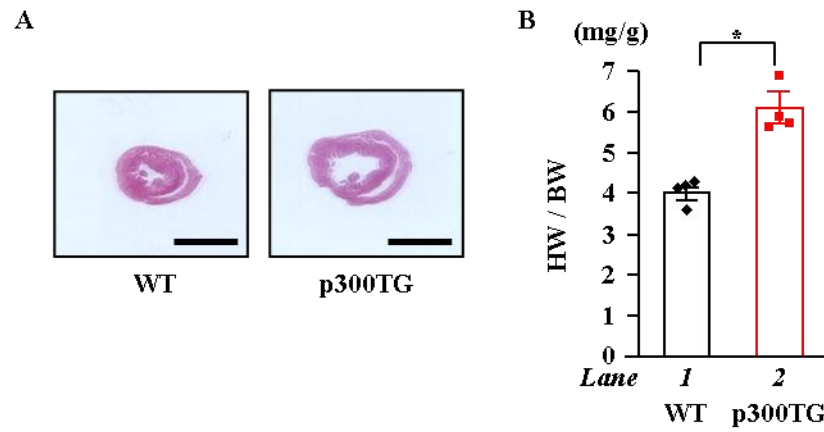

**Supplemental Fig. 3 Cardiac hypertrophy was observed in TG mice with cardiac overexpression of p300**

(A) The hearts of p300-TG mice were subjected to hematoxylin eosin staining at 26 weeks of age. Scale bar: 5 mm. (B) Heart weight / body weight (HW/BW) ratios at 26 weeks of age. (B), N=4; unpaired t-test.

\*  $p < 0.05$

**Supplemental Table 1**

| Stage                                                                                                                                                                                                                                                                                                                                                                                                                                                                                                                                                                                                                                                    | LVH        |                        | HF         |                          |
|----------------------------------------------------------------------------------------------------------------------------------------------------------------------------------------------------------------------------------------------------------------------------------------------------------------------------------------------------------------------------------------------------------------------------------------------------------------------------------------------------------------------------------------------------------------------------------------------------------------------------------------------------------|------------|------------------------|------------|--------------------------|
| Parameter                                                                                                                                                                                                                                                                                                                                                                                                                                                                                                                                                                                                                                                | DR 12w     | DS 12w                 | DR 21w     | DS 21w                   |
| LVPWd (mm)                                                                                                                                                                                                                                                                                                                                                                                                                                                                                                                                                                                                                                               | 2.2 ± 0.3  | 3.2 ± 0.3 <sup>*</sup> | 2.4 ± 0.2  | 3.4 ± 0.3 <sup>†</sup>   |
| IVSd (mm)                                                                                                                                                                                                                                                                                                                                                                                                                                                                                                                                                                                                                                                | 1.9 ± 0.2  | 2.6 ± 0.3 <sup>*</sup> | 1.8 ± 0.3  | 3.0 ± 0.3 <sup>†‡</sup>  |
| LVIDd (mm)                                                                                                                                                                                                                                                                                                                                                                                                                                                                                                                                                                                                                                               | 6.3 ± 0.4  | 5.7 ± 0.6              | 7.1 ± 0.2  | 6.9 ± 0.5                |
| IVIDs (mm)                                                                                                                                                                                                                                                                                                                                                                                                                                                                                                                                                                                                                                               | 2.7 ± 0.4  | 2.2 ± 0.6              | 3.1 ± 0.2  | 4.6 ± 0.4 <sup>†‡</sup>  |
| FS (%)                                                                                                                                                                                                                                                                                                                                                                                                                                                                                                                                                                                                                                                   | 57.8 ± 5.5 | 62.9 ± 6.9             | 57.1 ± 4.0 | 34.2 ± 5.2 <sup>†‡</sup> |
| <b>Supplemental Table 1. The data of echocardiography from salt resistant and sensitive Dahl rats</b><br>Abbreviations: LVH, Left ventricular hypertrophy, HF, Heart failure; DR, Dahl salt-resistant rat; DS, Dahl salt-sensitive rat; LVPWT, Left ventricular posterior wall thickness; IVSd, Interventricular septum thickness at end-diastole; LVIDd, left ventricular internal diameter at end diastole; IVIDs, left ventricular internal diameter at end systole; FS, Fractional shortening. N=4; two-way ANOVA followed by Tukey test. * <i>p</i> < 0.05 DR 12w vs DS 12w, † <i>p</i> < 0.05 DR 21w vs DS 21w, ‡ <i>p</i> < 0.05 DS 12w vs DS 21w |            |                        |            |                          |
